# Supplementary material for: Stimuli-induced multiple dissociation and micellization transitions of random copolymers
Source: Royal Society of Chemistry journal article supplement (doi:10.1039/c5ra07158e), 2015-01-01
Supplement: c5ra07158e1.pdf [file c5ra07158e1.pdf]

## Electronic Supplementary Information

### Stimuli-induced multiple dissociation and micellization transitions of random copolymers

Shasha Li<sup>a,c</sup>, Guangxin Chen<sup>a,c</sup>, Zheng Zhou<sup>a,c,\*</sup> and Qifang Li<sup>a,b,c,\*</sup>

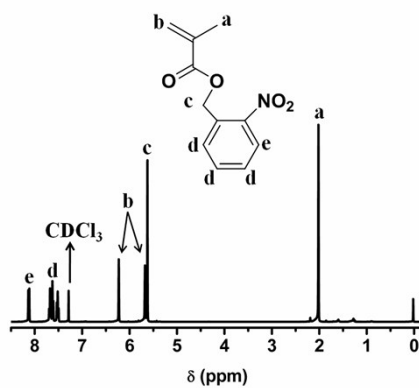

**Fig. S1** <sup>1</sup>H NMR spectrum of NBMA.

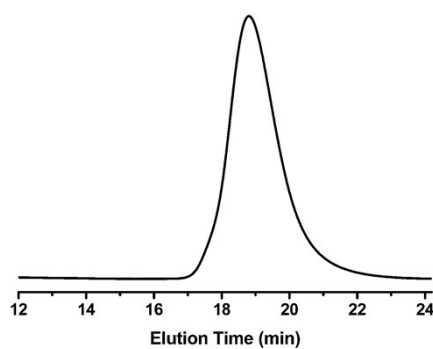

**Fig. S2** Gel permeation chromatography curves of P(NBMA-co-MEO<sub>2</sub>MA-co-OEGMA).
